# Supplementary material for: The role of unsaturated soil property functions in the practice of unsaturated soil mechanics
Source: Royal Society of Chemistry journal article supplement (doi:10.1039/c1ob06273e), 2000-01-01
Supplement: c1ob06273e.pdf [file c1ob06273e.pdf]

## Supplementary Information

# Thiacalix[4]arene Based Reconfigurable Molecular Switches: Set-Reset Memorized Sequential Device

Manoj Kumar,\* Rajesh Kumar, Vandana Bhalla

Department of Chemistry, UGC Sponsored-Center for Advance Studies-1,  
Guru Nanak Dev University  
Amritsar (Pb)-143005, India  
Email: [mksharmaa@yahoo.co.in](mailto:mksharmaa@yahoo.co.in)

| Contents                                                                                                                                                       | Page No. |
|----------------------------------------------------------------------------------------------------------------------------------------------------------------|----------|
| 1. <sup>1</sup> H NMR spectrum of <b>3</b> in CDCl <sub>3</sub> .                                                                                              | S2       |
| 2. <sup>13</sup> C NMR spectrum of <b>3</b> in CDCl <sub>3</sub> .                                                                                             | S3       |
| 3. FAB mass spectrum of <b>3</b> .                                                                                                                             | S4       |
| 4. <sup>1</sup> H NMR spectrum of <b>5</b> in CDCl <sub>3</sub> .                                                                                              | S5       |
| 5. <sup>13</sup> C NMR spectrum of <b>5</b> in CDCl <sub>3</sub> .                                                                                             | S6       |
| 6. ESI-MS mass spectrum of <b>5</b> .                                                                                                                          | S7       |
| 7. <sup>1</sup> H NMR spectrum of <b>7</b> in CDCl <sub>3</sub> .                                                                                              | S8       |
| 8. <sup>13</sup> C NMR spectrum of <b>7</b> in CDCl <sub>3</sub> .                                                                                             | S9       |
| 9. ESI-MS mass spectrum of <b>7</b> .                                                                                                                          | S10      |
| 10. Absorption spectra of compound <b>7</b> on addition of Fe <sup>3+</sup> in THF.                                                                            | S11      |
| 11. Fluorescence quantum yield.                                                                                                                                | S12      |
| 12. Proposed π-interactions between two naphthalene moieties with Fe <sup>3+</sup> ion.                                                                        | S13      |
| 13. Fluorescence emission spectra of receptor <b>7</b> upon addition of Fe <sup>3+</sup> in THF.                                                               | S14      |
| 14. Binding modes of compound <b>5</b> and <b>7</b> upon addition of Fe <sup>3+</sup> ion.                                                                     | S15      |
| 15. Fluorescence emission spectra of receptor <b>7</b> upon addition of Hg <sup>2+</sup> in THF.                                                               | S16      |
| 16. <sup>1</sup> H NMR of compound <b>5</b> + Hg <sup>2+</sup> (5 equiv) ions in CDCl <sub>3</sub> + CD <sub>3</sub> CN (8:2, v/v).                            | S17      |
| 17. <sup>1</sup> H NMR of compound <b>5</b> + K <sup>+</sup> (5 equiv) ions in CDCl <sub>3</sub> + CD <sub>3</sub> CN (8:2, v/v).                              | S18      |
| 18. Job plot of compounds <b>3</b> , <b>5</b> and <b>7</b> with Fe <sup>3+</sup> / Hg <sup>2+</sup> / F <sup>-</sup> in THF.                                   | S19      |
| 19. Fluorescence emission spectra of receptor <b>7</b> (10 μM) upon addition of F <sup>-</sup> in THF.                                                         | S20      |
| 20. <sup>1</sup> H NMR of compound <b>3</b> with F <sup>-</sup> ions (1.0 equiv) in CDCl <sub>3</sub> .                                                        | S21      |
| 21. <sup>1</sup> H NMR of compound <b>5</b> with F <sup>-</sup> ions (1.0 equiv) in CDCl <sub>3</sub> .                                                        | S22      |
| 22. Selectivity of compounds <b>3</b> , <b>5</b> and <b>7</b> towards F <sup>-</sup> ions over other anions.                                                   | S23      |
| 23. Fluorescence emission spectra of receptor <b>3</b> .Fe <sup>3+</sup> .F <sup>-</sup> upon addition of Fe <sup>3+</sup> in THF.                             | S24      |
| 24. Fluorescence emission spectra of receptor <b>7</b> .Fe <sup>3+</sup> upon addition of Hg <sup>2+</sup> in THF.                                             | S25      |
| 25. The “On-Off” switchable process and allosteric behaviour with Fe <sup>3+</sup> and Hg <sup>2+</sup> ions.                                                  | S26      |
| 26. Fluorescence emission spectra of <b>5</b> .Fe <sup>3+</sup> .Hg <sup>2+</sup> and <b>7</b> .Fe <sup>3+</sup> .Hg <sup>2+</sup> with Fe <sup>3+</sup> ions. | S27      |
| 27. The “On-Off” switchable process and allosteric behaviour with Fe <sup>3+</sup> and K <sup>+</sup> ions.                                                    | S28      |
| 28. Fluorescence emission spectra of receptor <b>7</b> .Fe <sup>3+</sup> complex with F <sup>-</sup> ions in THF.                                              | S29      |
| 29. Fluorescence emission spectra of <b>5</b> .Fe <sup>3+</sup> .F <sup>-</sup> and <b>7</b> .Fe <sup>3+</sup> .F <sup>-</sup> with Fe <sup>3+</sup> ions.     | S30      |

1.  $^1\text{H}$  NMR spectrum of **3** in  $\text{CDCl}_3$ .

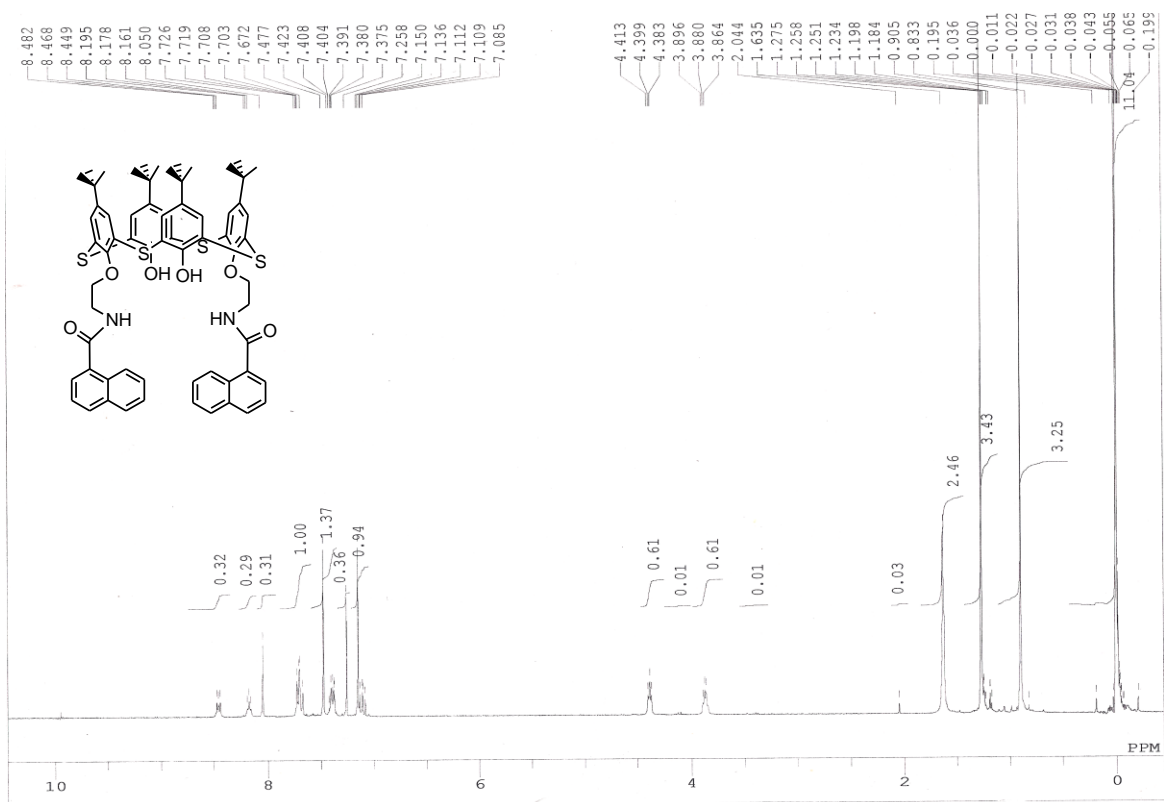

**Figure S1.**  $^1\text{H}$  NMR spectrum of **3** in  $\text{CDCl}_3$ .

2.  $^{13}\text{C}$  NMR Spectrum of **3** in  $\text{CDCl}_3$ .

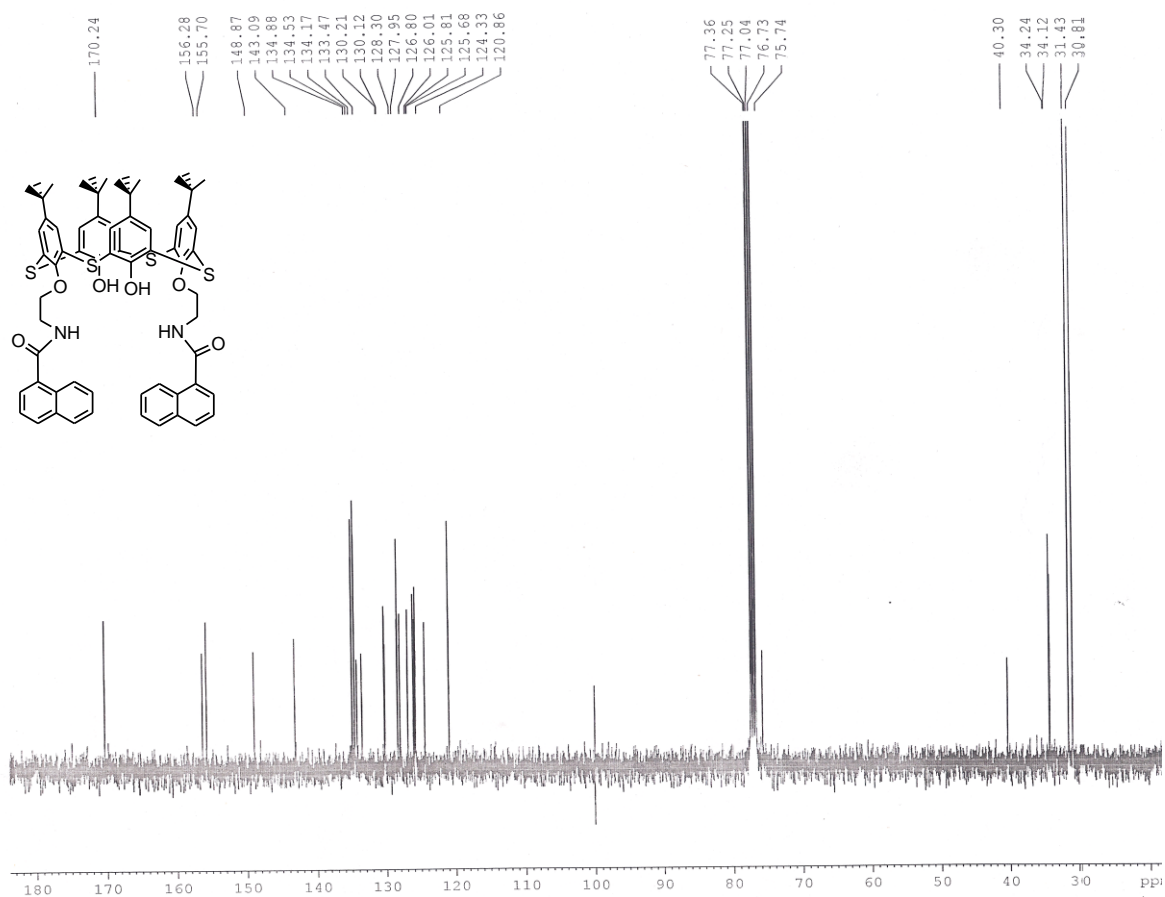

**Figure S2.**  $^{13}\text{C}$  NMR spectrum of **3** in  $\text{CDCl}_3$ .

### 3. FAB mass spectrum of **3**.

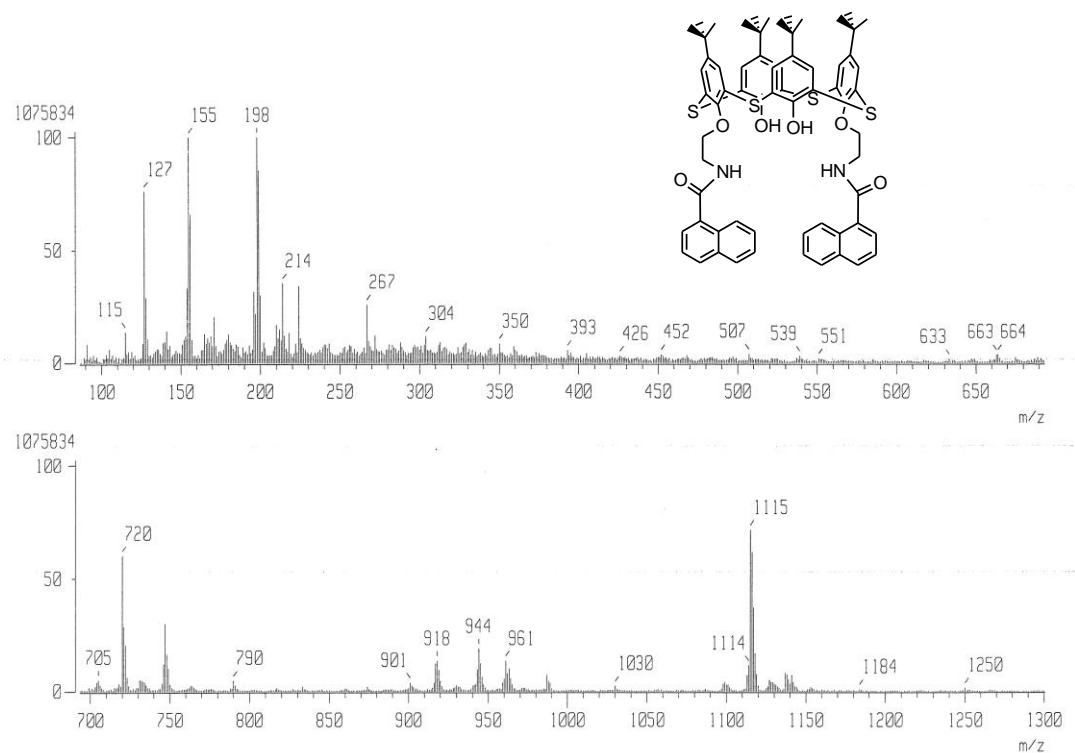

**Figure S3.** FAB mass spectrum of **3**.

4.  $^1\text{H}$  NMR spectrum of **5** in  $\text{CDCl}_3$ .

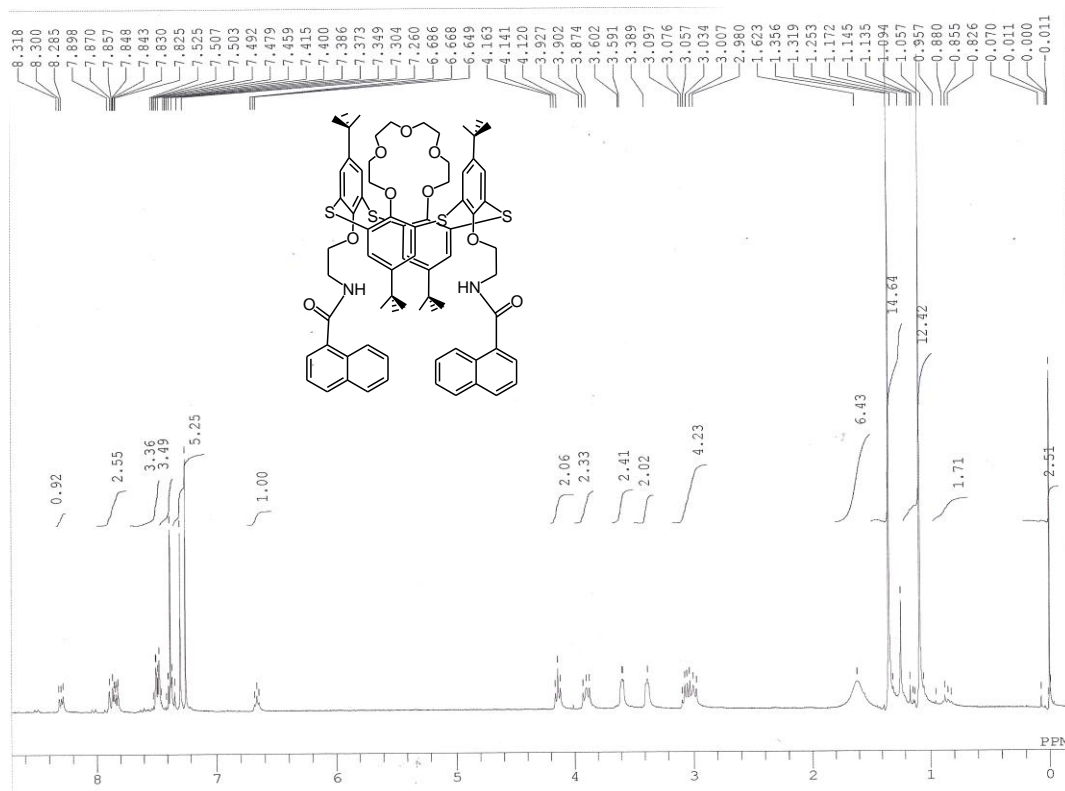

**Figure S4.**  $^1\text{H}$  NMR spectrum of **5** in  $\text{CDCl}_3$ .

5.  $^{13}\text{C}$  NMR Spectrum of **5** in  $\text{CDCl}_3$ .

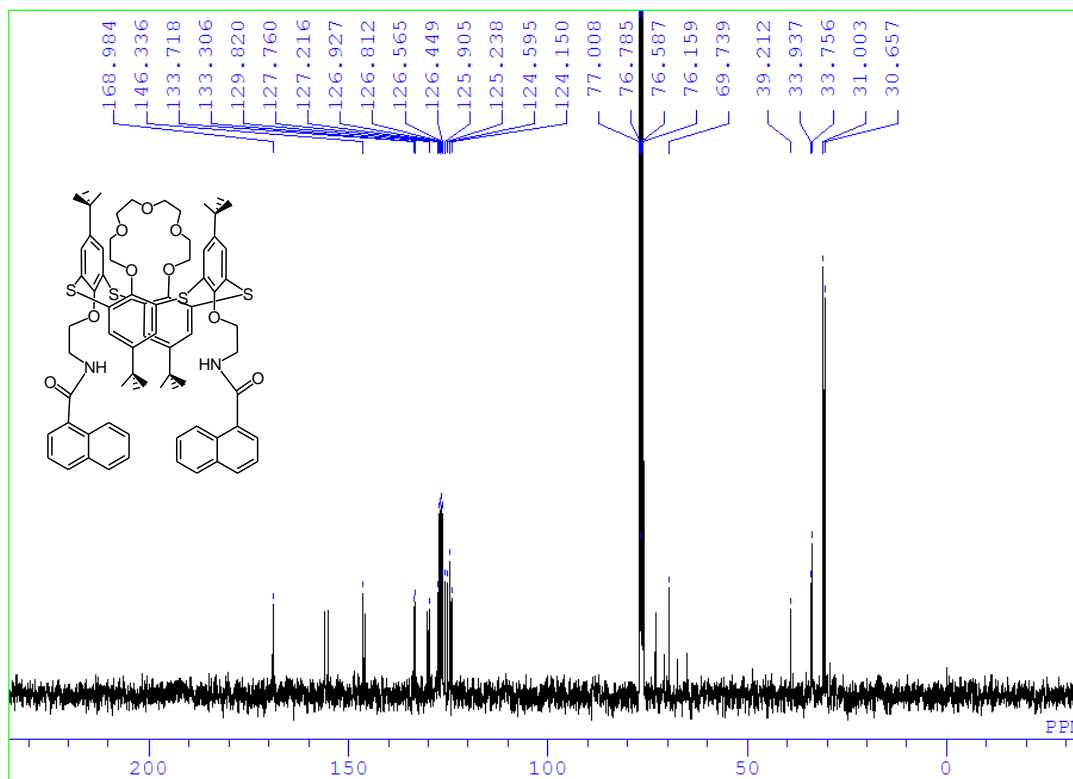

**Figure S5.**  $^{13}\text{C}$  NMR spectrum of **5** in  $\text{CDCl}_3$ .

6. ESI mass spectrum of **5**.

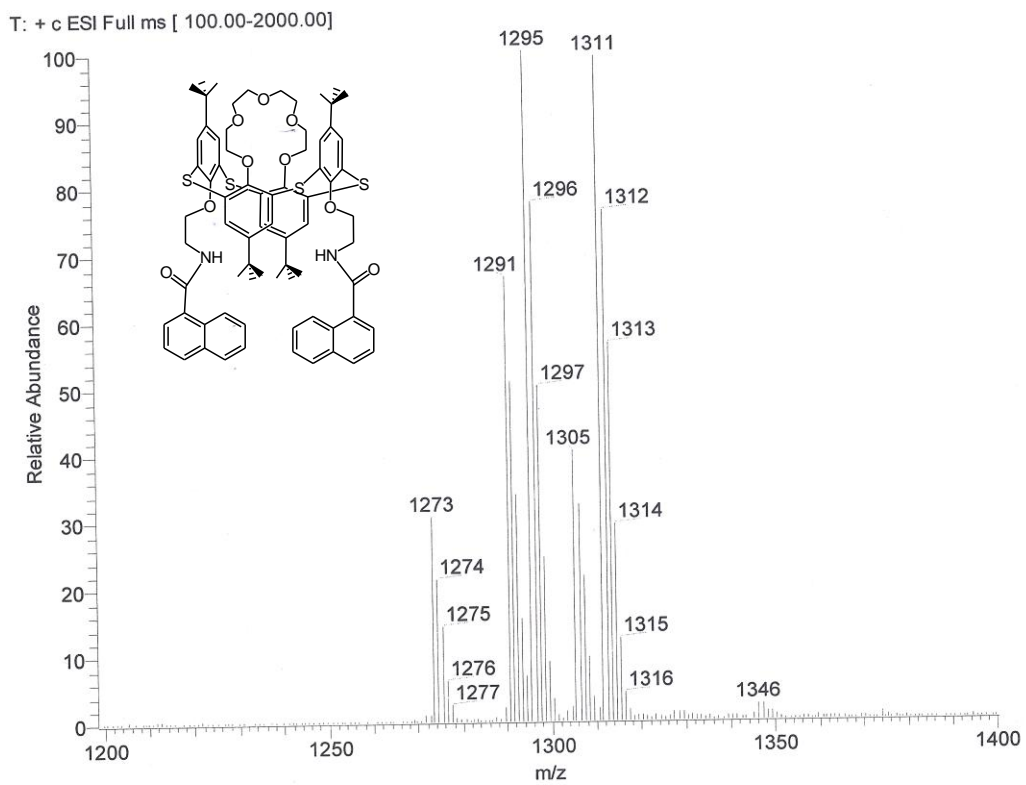

**Figure S6.** ESI-MS mass spectrum of **5**.

7.  $^1\text{H}$  NMR spectrum of **7** in  $\text{CDCl}_3$ .

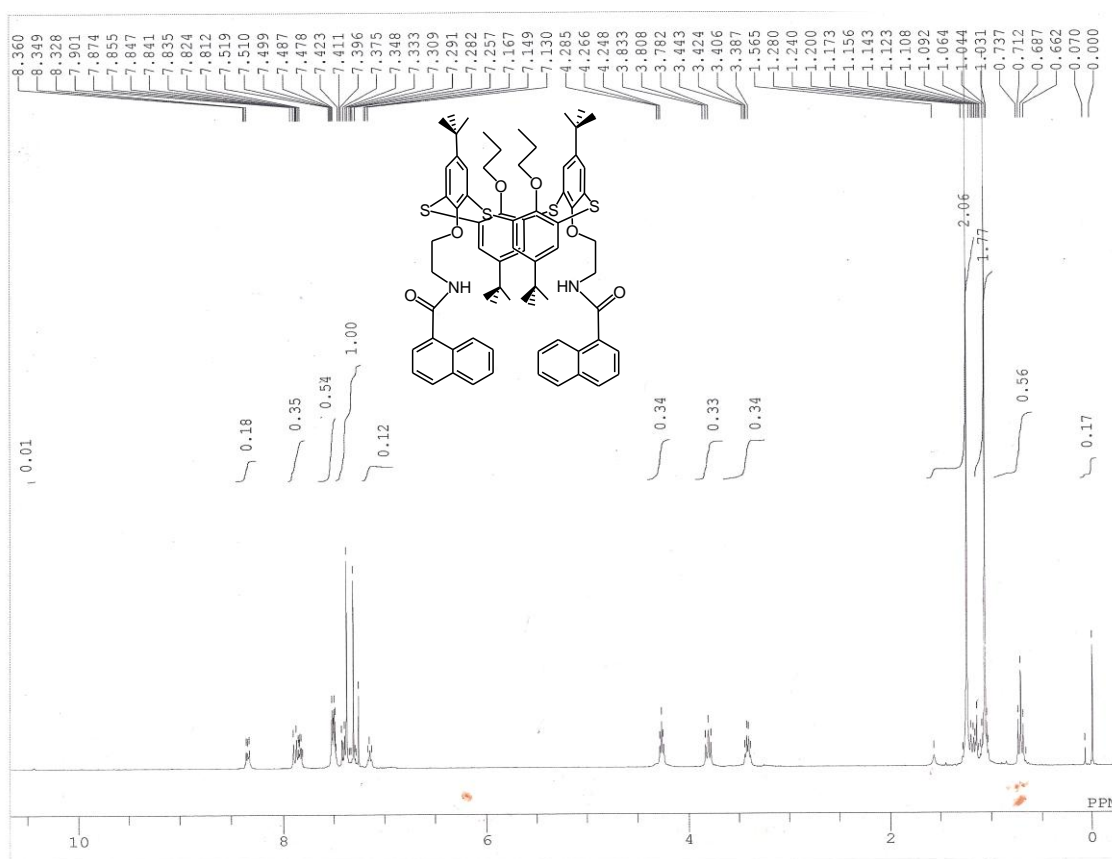

Figure S7.  $^1\text{H}$  NMR spectrum of **7** in  $\text{CDCl}_3$ .



8.  $^{13}\text{C}$  NMR Spectrum of **7** in  $\text{CDCl}_3$ .

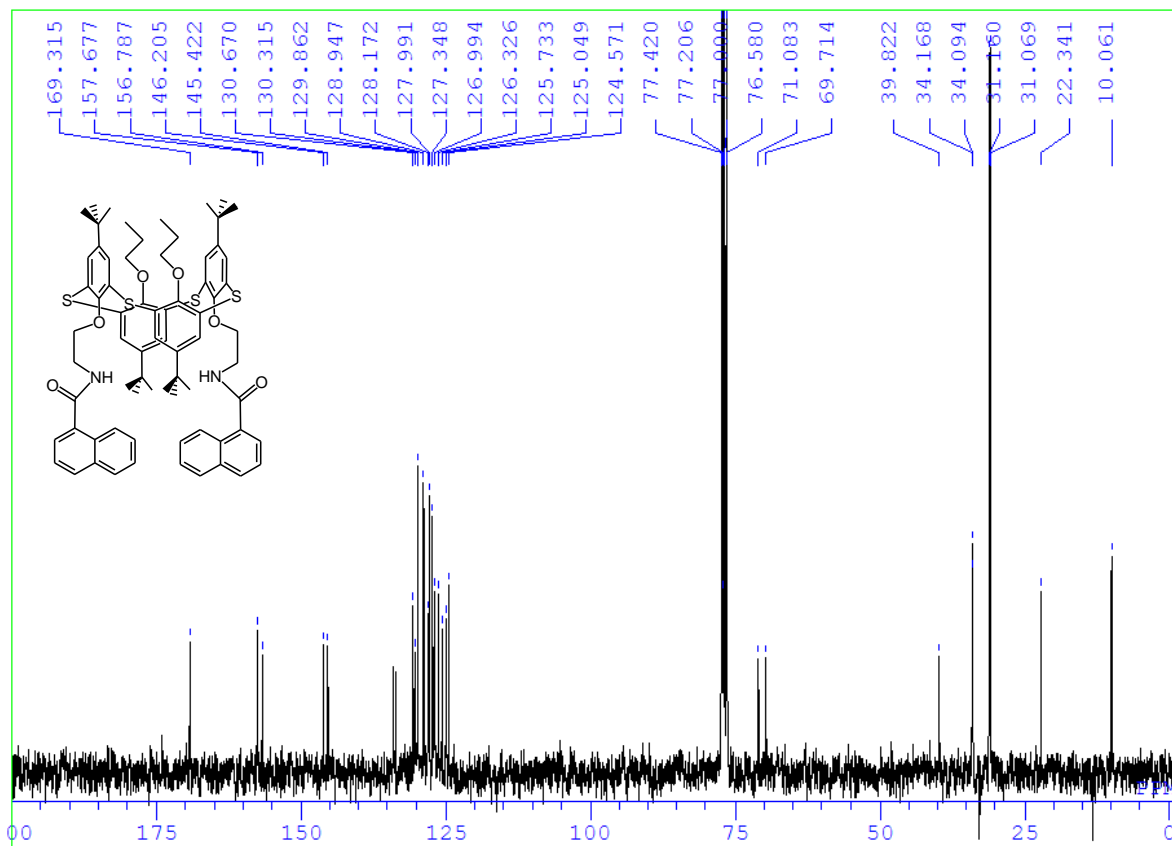

**Figure S8.**  $^{13}\text{C}$  NMR spectrum of **7** in  $\text{CDCl}_3$ .

9. ESI-MS mass spectrum of **7**.

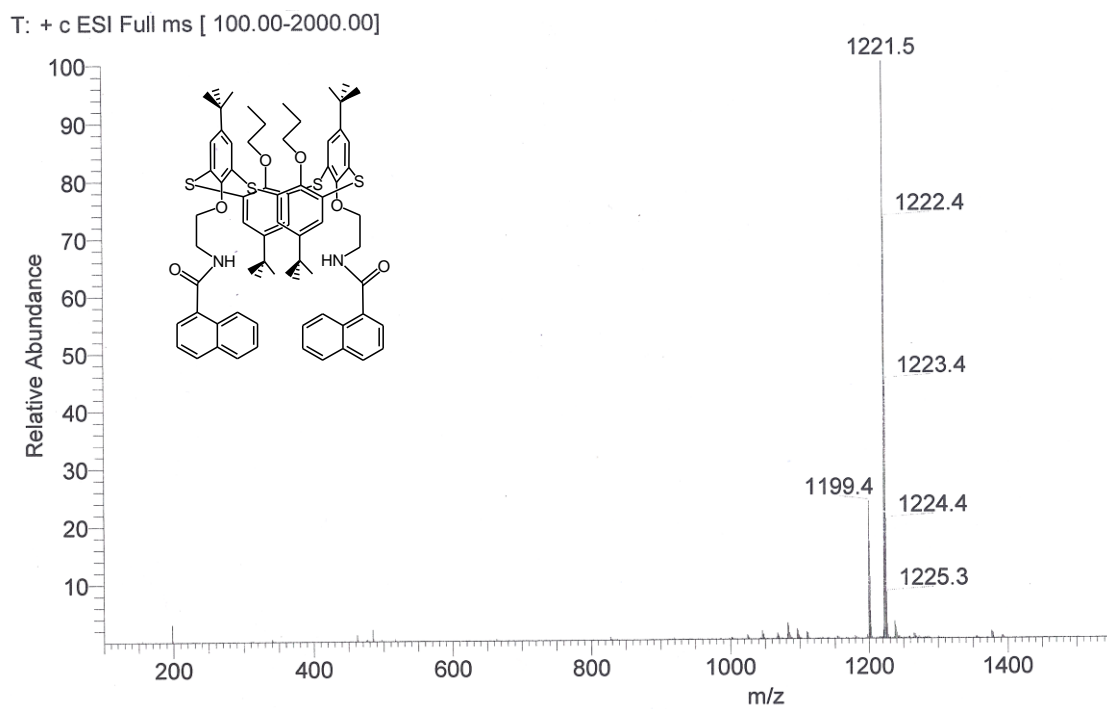

**Figure S9.** ESI-MS mass spectrum of **7**.

10. Absorption spectra of compound **7** (10  $\mu\text{M}$ ) on addition of  $\text{Fe}^{3+}$  in THF.

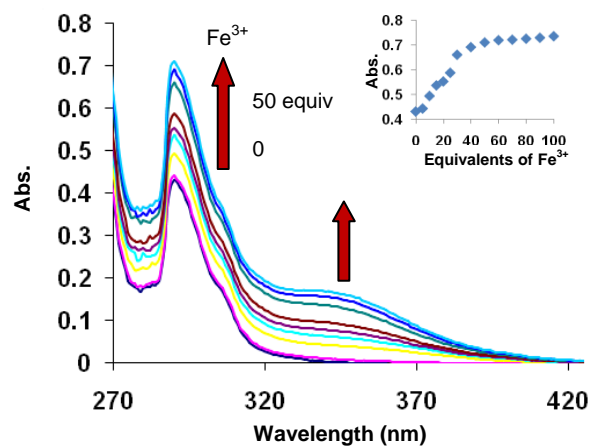

**Figure S10.** Absorption spectra of compound **7** (10  $\mu\text{M}$ ) on addition of  $\text{Fe}^{3+}$  (0 - 50 equiv) in THF.

## 11. Fluorescence Quantum yield.

Fluorescence quantum yield  $\phi_f$  was determined in analytical grade THF using optically matching solutions of naphthalene  $\phi_f = 0.23$  in ethanol as the standard at an excitation wavelength of 275 nm and the quantum yield was calculated using following equation

$$\phi_{fs} = \phi_{fr} \times \frac{1 - 10^{-A_r L_r}}{1 - 10^{-A_s L_s}} \times \frac{N_s^2}{N_r^2} \times \frac{D_s}{D_r}$$

The quantum yield is measured at room temperature by a single excitation wavelength (338 nm for **3** coming from Xenon lamp of the spectrofluorophotometer and calculated according to the above equation.  $\phi_{fs}$  is the radiative quantum yield of the sample,  $\phi_{fr}$  radiative quantum yield of reference,  $A_s$  and  $A_r$  are the absorbance of the sample and the reference respectively,  $D_s$  and  $D_r$  the respective areas of emission for sample and reference respectively.  $L_s$  and  $L_r$  are the lengths of the absorption cells respectively.  $N_s$  and  $N_r$  are the index of refraction of the sample and reference solutions (pure solvents were assumed respectively).

**Table 2.** Quantum yields of receptors **3**, **5**, **7** and their cation and anion complexes.

| Receptors and complexes              | Quantum yield |
|--------------------------------------|---------------|
| 3                                    | 0.159         |
| 3.Fe <sup>3+</sup>                   | 0.447         |
| 3.F <sup>-</sup>                     | 0.330         |
| 3.Fe <sup>3+</sup> .F <sup>-</sup>   | 0.152         |
| 5                                    | 0.134         |
| 5.Fe <sup>3+</sup>                   | 0.011         |
| 5.Hg <sup>2+</sup>                   | 0.263         |
| 5.K <sup>+</sup>                     | 0.220         |
| 5.F <sup>-</sup>                     | 0.271         |
| 5.Fe <sup>3+</sup> .Hg <sup>2+</sup> | 0.11          |
| 5.Fe <sup>3+</sup> .K <sup>+</sup>   | 0.044         |
| 5.Fe <sup>3+</sup> .F <sup>-</sup>   | 0.072         |
| 7                                    | 0.067         |
| 7.Fe <sup>3+</sup>                   | 0.007         |
| 7.Hg <sup>2+</sup>                   | 0.227         |
| 7.F <sup>-</sup>                     | 0.294         |
| 7.Fe <sup>3+</sup> .Hg <sup>2+</sup> | 0.139         |
| 7.Fe <sup>3+</sup> .F <sup>-</sup>   | 0.088         |

12. Proposed  $\pi$ -Interactions between two naphthalene moieties upon addition of  $\text{Fe}^{3+}$  ion.

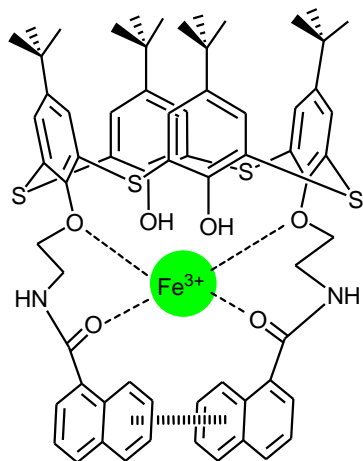

**Figure S11.** Proposed  $\pi$ -Interactions between two naphthalene moieties upon addition of  $\text{Fe}^{3+}$  ion.

13. Fluorescence emission spectra of receptor **7** (10  $\mu\text{M}$ ) upon addition of  $\text{Fe}^{3+}$  in THF.

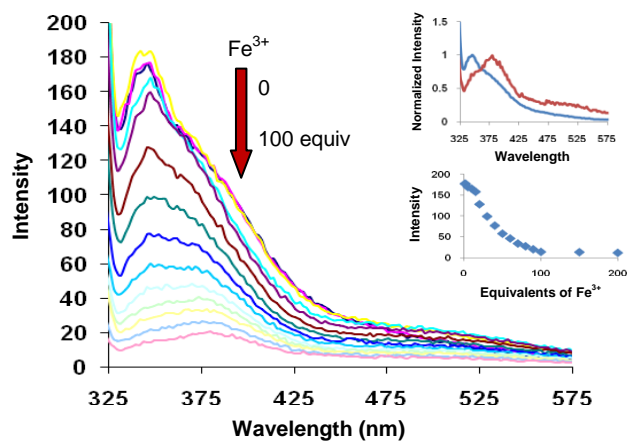

**Figure S12.** Fluorescence emission spectra of receptor **7** (10  $\mu\text{M}$ ) upon various addition of  $\text{Fe}^{3+}$  (0-100 equiv) in THF.

14. Pictorial representation of binding modes of compound **5** and **7** upon addition of  $\text{Fe}^{3+}$  ion.

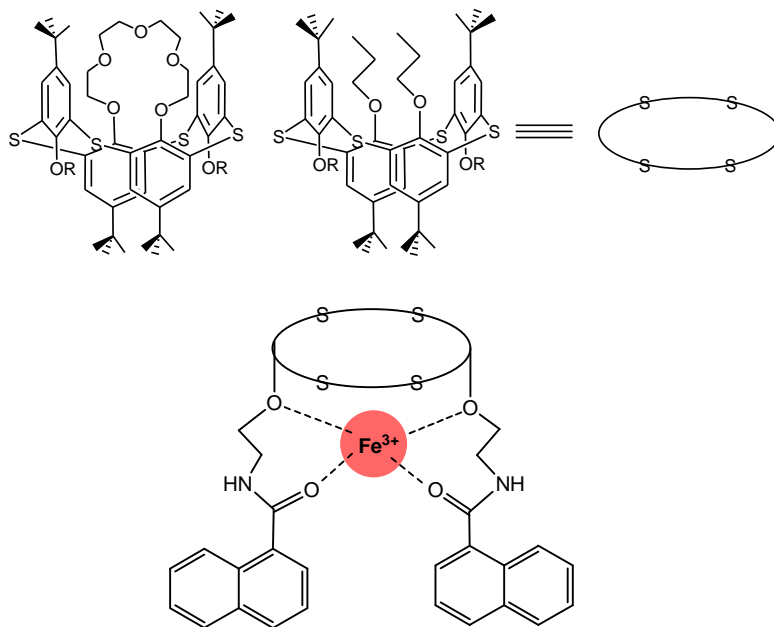

**Figure S13.** Pictorial representation of binding modes of compound **5** and **7** upon addition of  $\text{Fe}^{3+}$  ion.

15. Fluorescence emission spectra of receptor **7** (10  $\mu\text{M}$ ) upon addition of  $\text{Hg}^{2+}$  in THF.

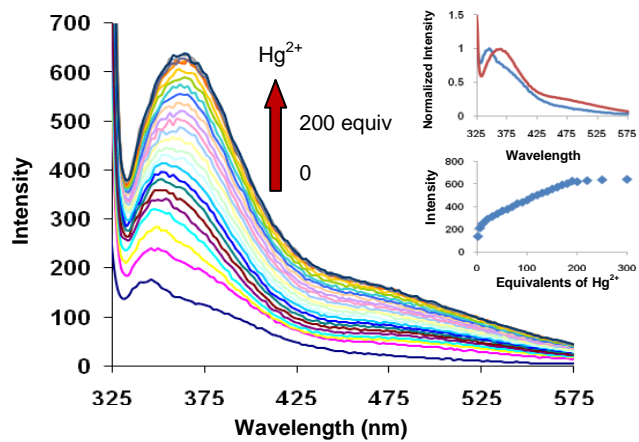

**Figure S14.** Fluorescence emission spectra of receptor **7** (10  $\mu\text{M}$ ) upon various addition of  $\text{Hg}^{2+}$  (0-200 equiv) in THF.



16.  $^1\text{H}$  NMR of compound **5** +  $\text{Hg}^{2+}$  (5 equiv) ions in  $\text{CDCl}_3$  +  $\text{CD}_3\text{CN}$  (8:2, v/v).

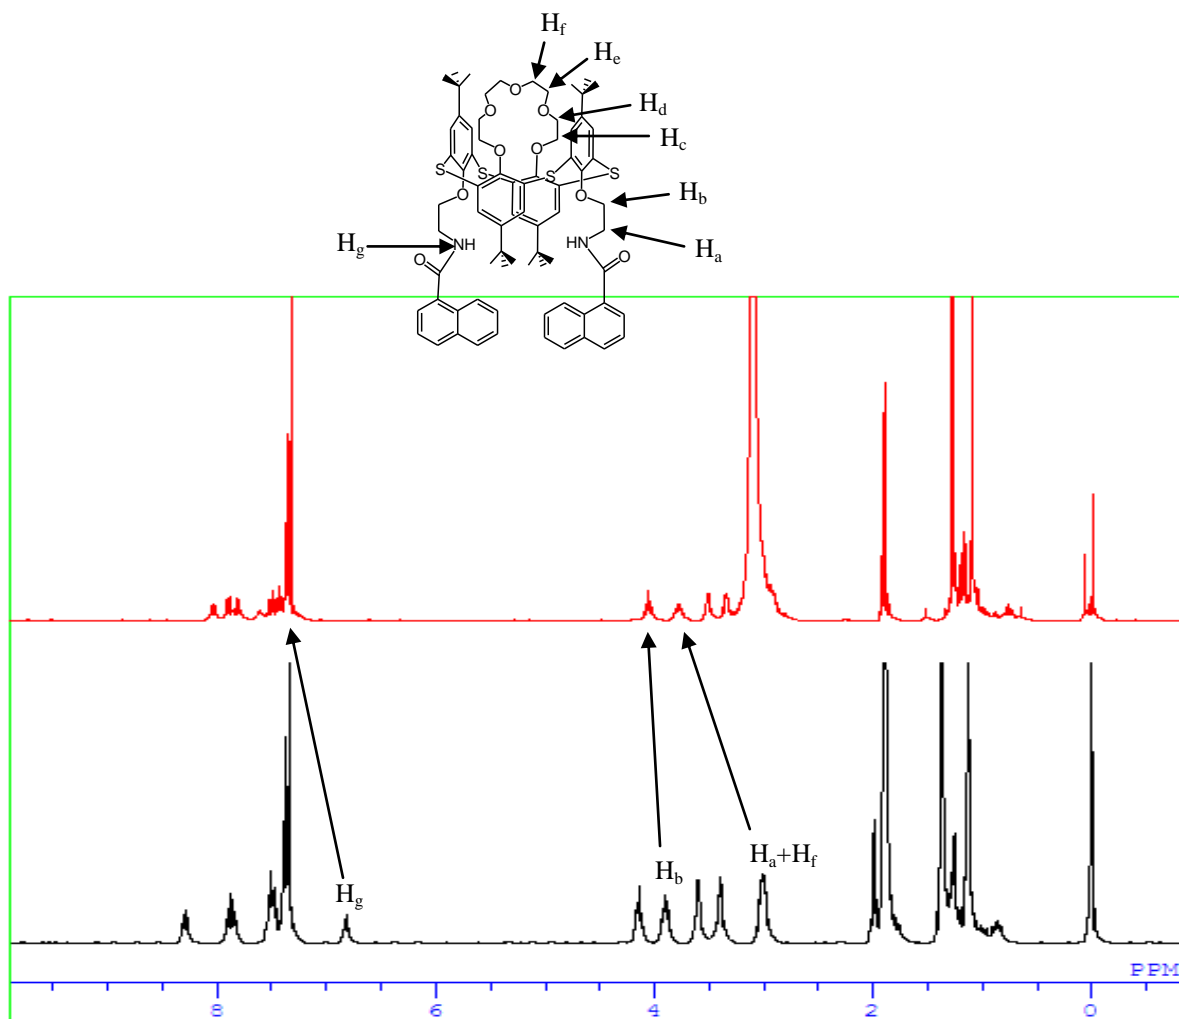

**Figure S15.**  $^1\text{H}$  NMR of compound **5** +  $\text{Hg}^{2+}$  (5 equiv) ions in  $\text{CDCl}_3$  +  $\text{CD}_3\text{CN}$  (8:2, v/v).

17.  $^1\text{H}$  NMR of compound **5** +  $\text{K}^+$  (5 equiv) ions in  $\text{CDCl}_3$  +  $\text{CD}_3\text{CN}$  (8:2, v/v).

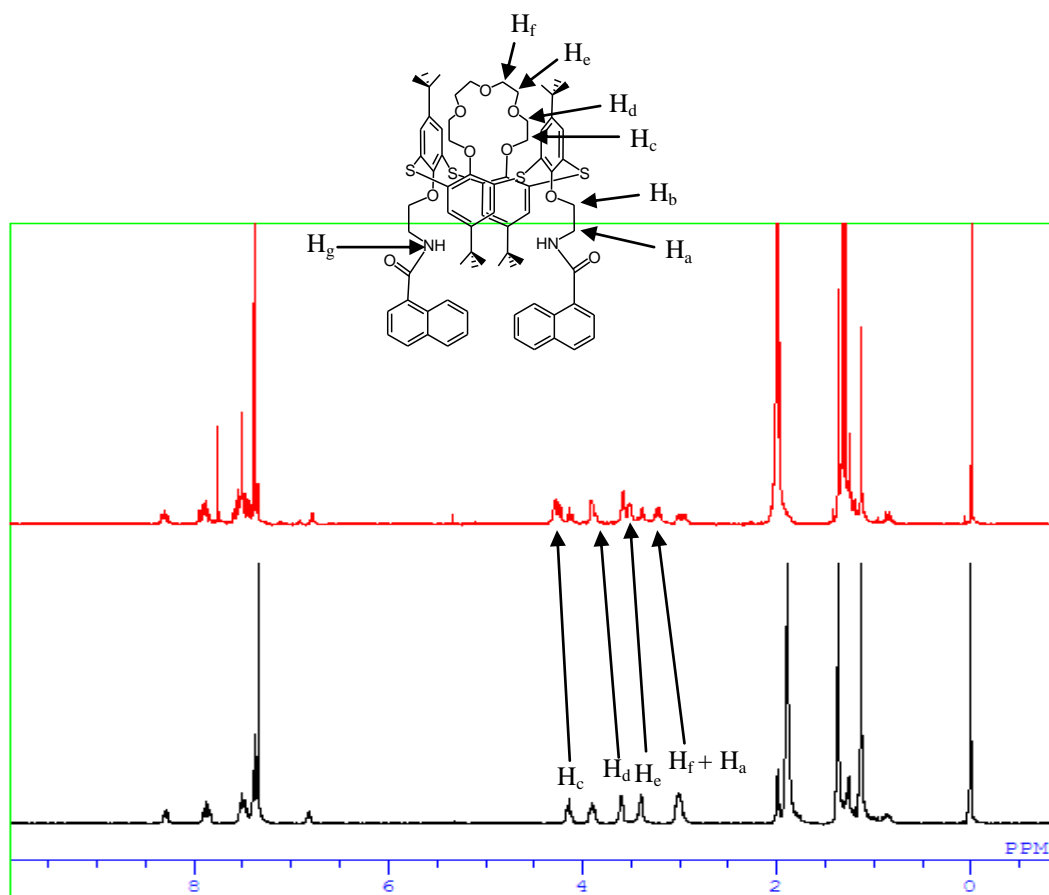

**Figure S16.**  $^1\text{H}$  NMR of compound **5** +  $\text{K}^+$  (5 equiv) ions in  $\text{CDCl}_3$  +  $\text{CD}_3\text{CN}$  (8:2, v/v).

18. Job plot of compounds **3**, **5** and **7** with  $\text{Fe}^{3+}$  /  $\text{Hg}^{2+}$  /  $\text{F}^-$  in THF.

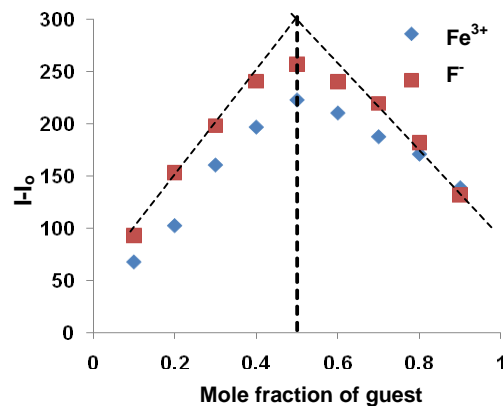

**Figure S17.** Job's plot of **3** with  $\text{Fe}^{3+}$  and  $\text{F}^-$  in THF. (Guest =  $\text{Fe}^{3+}$  or  $\text{F}^-$ ).

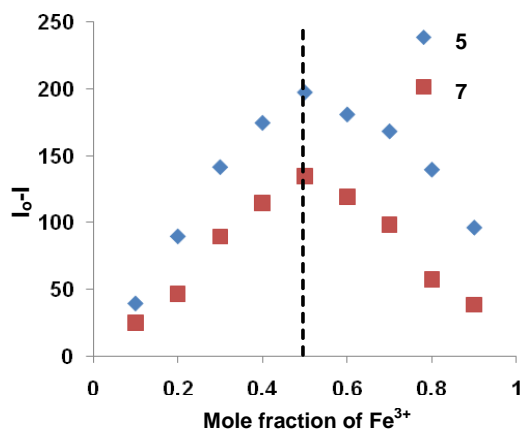

**Figure S18.** Job's plot of **5** and **7** with  $\text{Fe}^{3+}$  in THF.

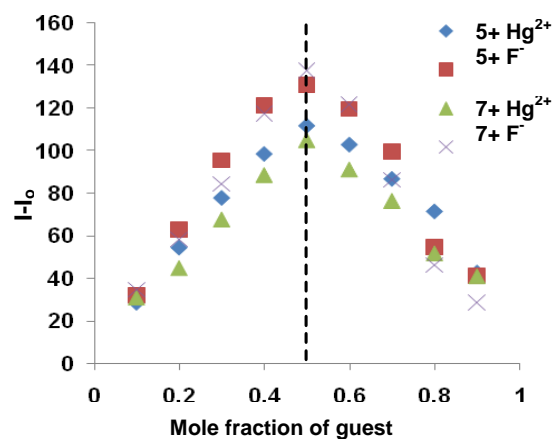

**Figure S19.** Job's plot of **5** and **7** with  $\text{Hg}^{2+}$  and  $\text{F}^-$  in THF. (Guest =  $\text{Hg}^{2+}$  or  $\text{F}^-$ ).

19. Fluorescence emission spectra of receptor **7** (10  $\mu\text{M}$ ) upon addition of  $\text{F}^-$  in THF.

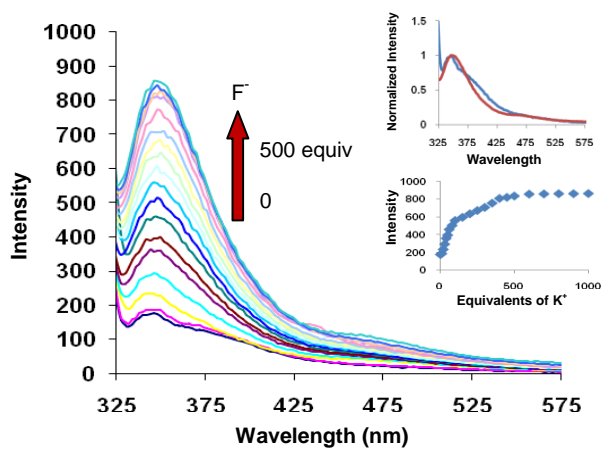

**Figure S20.** Fluorescence emission spectra of receptor **7** (10  $\mu\text{M}$ ) upon various addition of  $\text{F}^-$  (0-500 equiv) in THF.

20.  $^1\text{H}$  NMR of compound **3** with  $\text{F}^-$  ions (1.0 equiv) in  $\text{CDCl}_3$ .

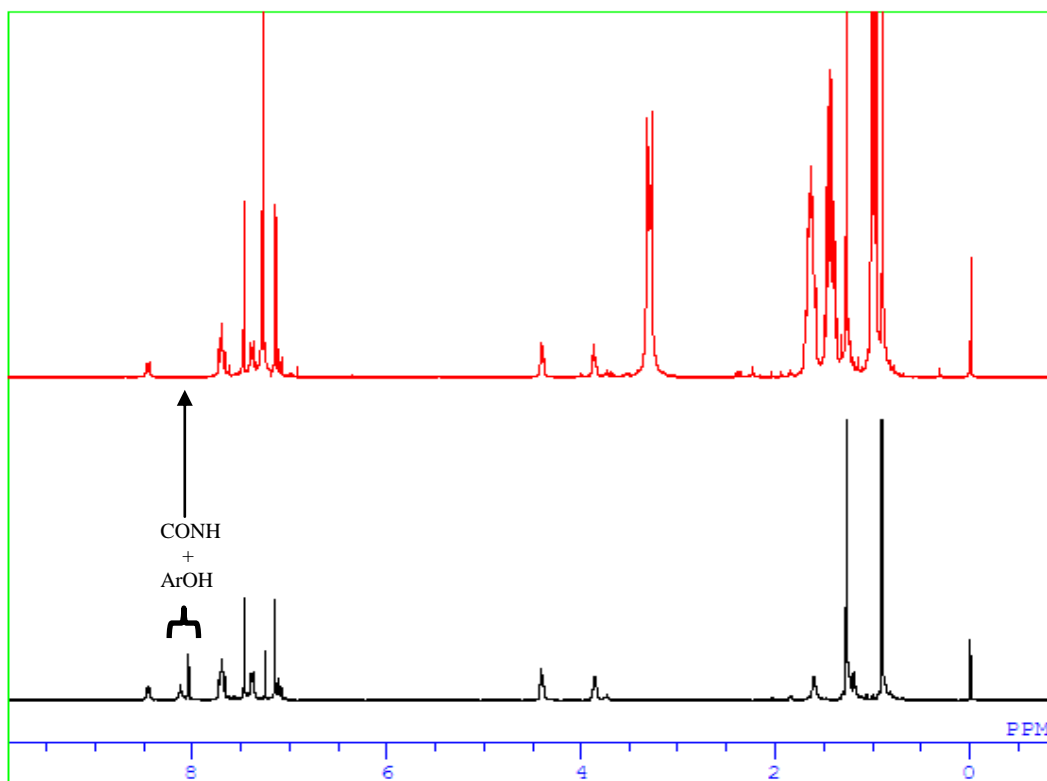

**Figure S21.**  $^1\text{H}$  NMR of compound **3** with  $\text{F}^-$  ions (1.0 equiv) in  $\text{CDCl}_3$ .

21.  $^1\text{H}$  NMR of compound **5** with  $\text{F}^-$  ions (1.0 equiv) in  $\text{CDCl}_3$ .

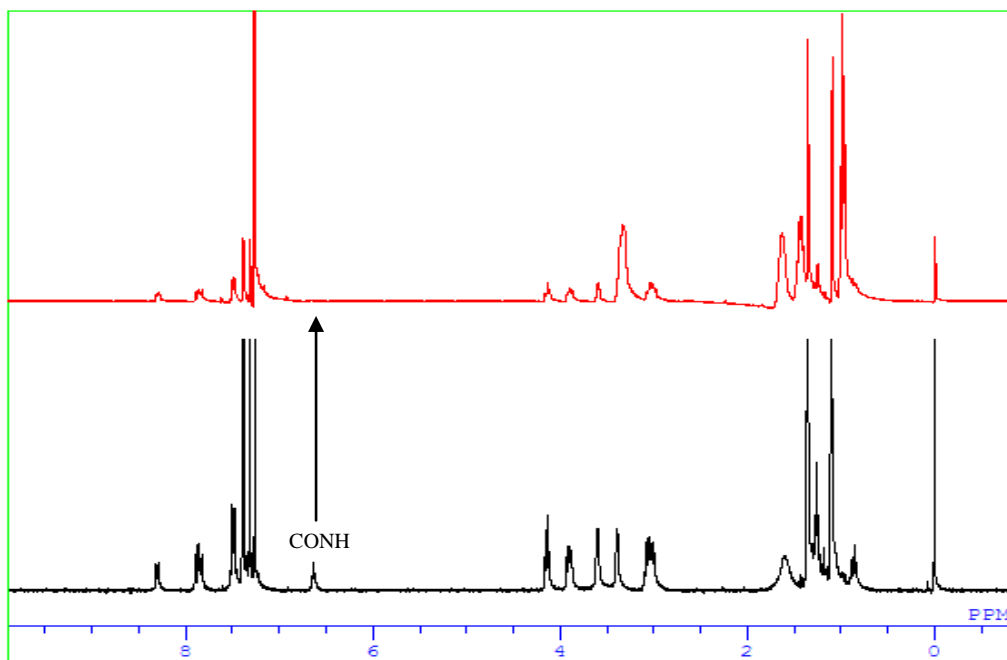

**Figure S22.**  $^1\text{H}$  NMR of compound **5** with  $\text{F}^-$  ions (1.0 equiv) in  $\text{CDCl}_3$ .

22. Selectivity of compounds **3**, **5** and **7** towards F<sup>-</sup> ions over other anions.

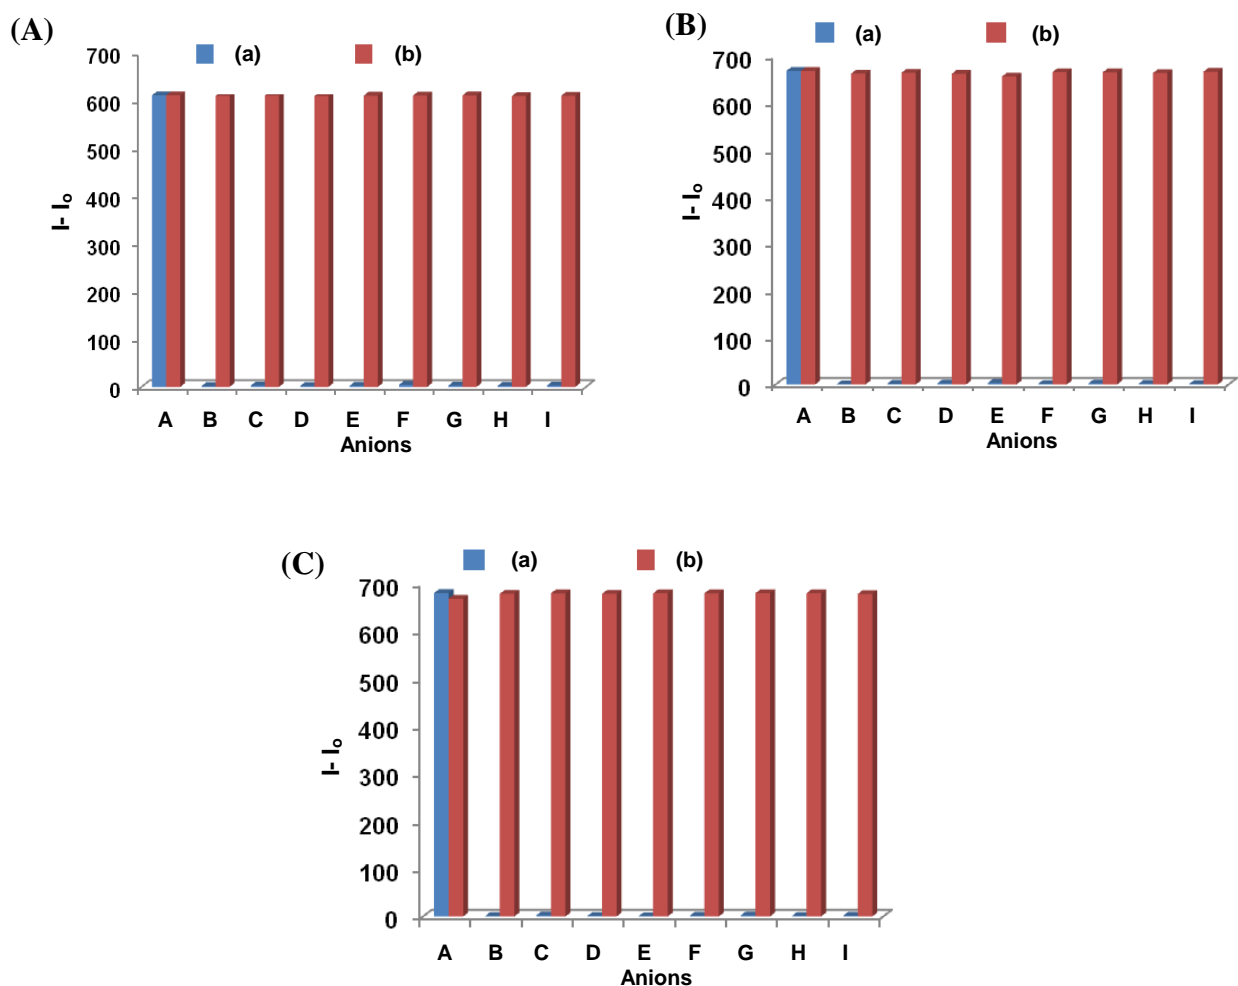

**Figure S23.** (a) Selectivity of (A) **3**, (B) **5**, (C) **7** (10  $\mu$ M, each) toward F<sup>-</sup> ions (500 equiv) upon addition of different anions and (b) Competitive selectivity of (A) **3**, (B) **5**, (C) **7** (10  $\mu$ M, each) towards F<sup>-</sup> ions (500 equiv) in the presence of different anions in THF. A = F<sup>-</sup>, B = Cl<sup>-</sup>, C = Br<sup>-</sup>, D = I<sup>-</sup>, E = OAc<sup>-</sup>, F = CN<sup>-</sup>, G = HSO<sub>4</sub><sup>-</sup>, H = NO<sub>3</sub><sup>-</sup>, I = H<sub>2</sub>PO<sub>4</sub><sup>-</sup>.

23. Fluorescence emission spectra of receptor  $3 \cdot \text{Fe}^{3+} \cdot \text{F}^-$  upon addition of  $\text{Fe}^{3+}$  in THF.

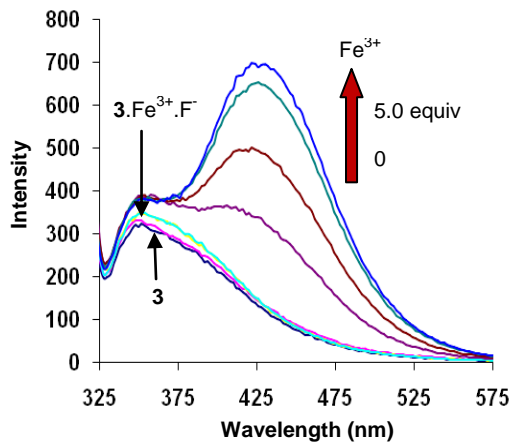

**Figure S24.** Fluorescence emission spectra of  $3 \cdot \text{Fe}^{3+} \cdot \text{F}^-$  upon various addition of  $\text{Fe}^{3+}$  (0-5.0 equiv) in THF.



24. Fluorescence emission spectra of receptor **7**.Fe<sup>3+</sup> upon addition of Hg<sup>2+</sup> in THF.

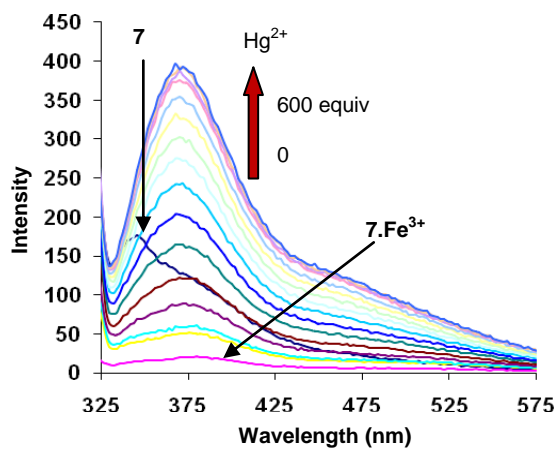

**Figure S25.** Fluorescence emission spectra of receptor **7**.Fe<sup>3+</sup> upon various addition of Hg<sup>2+</sup> (0-600 equiv) in THF.

25. The “On-Off” switchable process and allosteric behaviour with  $\text{Fe}^{3+}$  and  $\text{Hg}^{2+}$  ions.

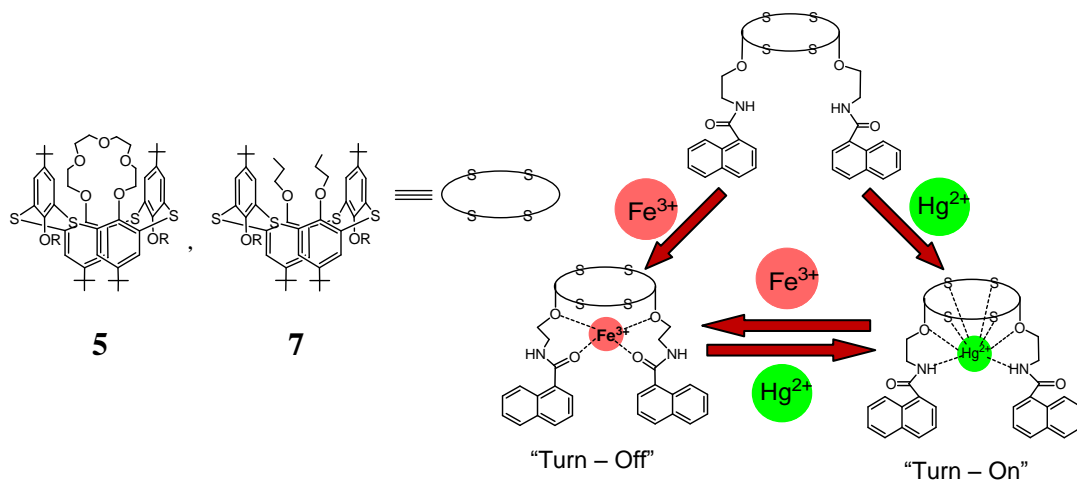

**Figure S26.** The compounds 5 and 7 showing “On-Off” switchable process with negative allosteric behaviour with  $\text{Fe}^{3+}$  and  $\text{Hg}^{2+}$  ions.

26. Fluorescence emission spectra of  $5.\text{Fe}^{3+}.\text{Hg}^{2+}$  and  $7.\text{Fe}^{3+}.\text{Hg}^{2+}$  upon addition of  $\text{Fe}^{3+}$  ions.

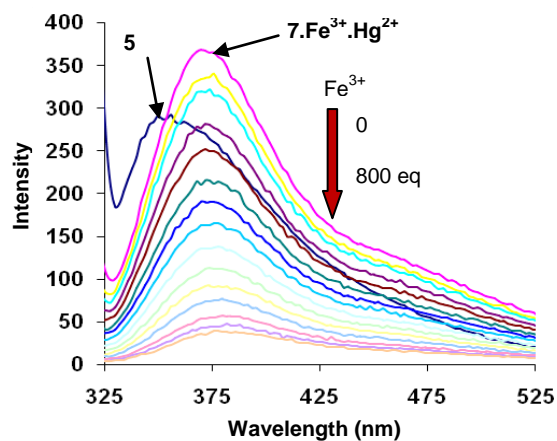

**Figure S27.** Fluorescence emission spectra of  $5.\text{Fe}^{3+}.\text{Hg}^{2+}$  upon various addition of  $\text{Fe}^{3+}$  (0-800 equiv) in THF.

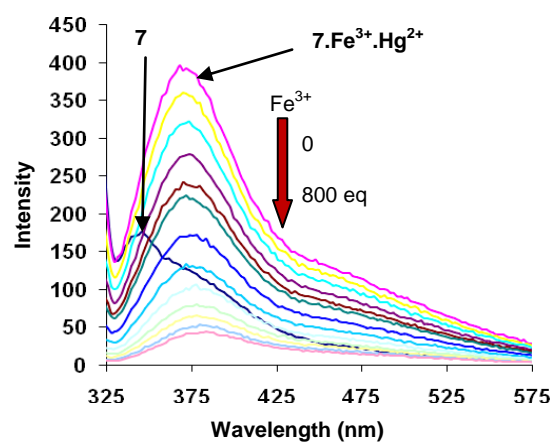

**Figure S28.** Fluorescence emission spectra of  $7.\text{Fe}^{3+}.\text{Hg}^{2+}$  upon various addition of  $\text{Fe}^{3+}$  (0-800 equiv) in THF.

27. The “On-Off” switchable process and allosteric behaviour of compound **5** with  $\text{Fe}^{3+}$  and  $\text{K}^+$  ions.

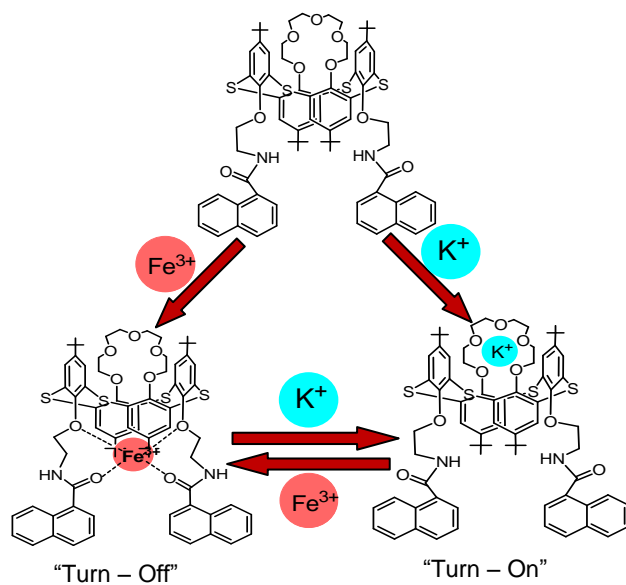

**Figure S29.** The compound **5** showing “On-Off” switchable process with negative allosteric behaviour with  $\text{Fe}^{3+}$  and  $\text{K}^+$  ions.

28. Fluorescence emission spectra of receptor  $7\cdot\text{Fe}^{3+}$  complex upon addition of  $\text{F}^-$  in THF.

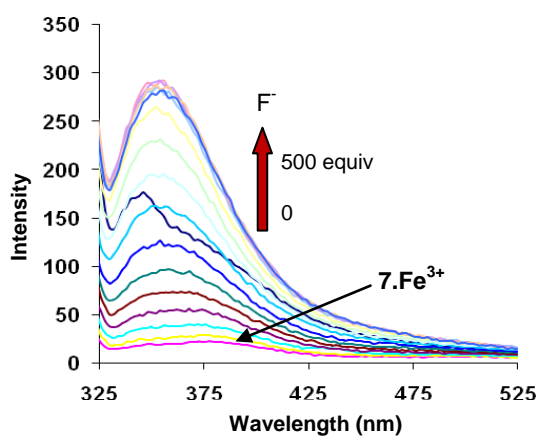

**Figure S30.** Fluorescence emission spectra of receptor  $7\cdot\text{Fe}^{3+}$  complex upon various addition of  $\text{F}^-$  (0-500 equiv) in THF.

29. Fluorescence emission spectra of  $5.Fe^{3+}.F^-$  complex and  $7.Fe^{3+}.F^-$  complex upon addition of  $Fe^{3+}$  ions.

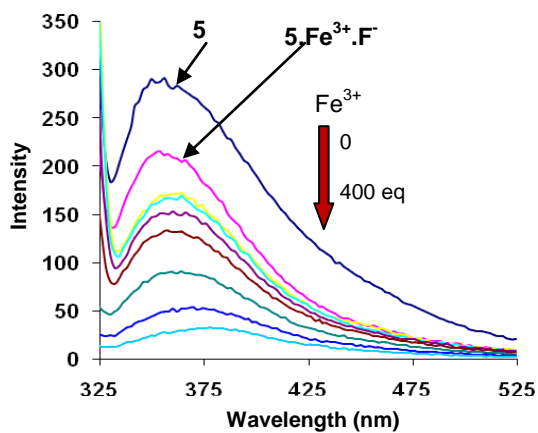

**Figure S31.** Fluorescence emission spectra of  $5.Fe^{3+}.F^-$  complex upon various addition of  $Fe^{3+}$  (0-400 equiv) in THF.

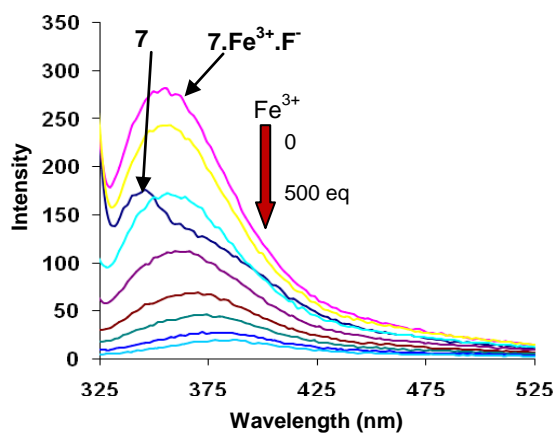

**Figure S32.** Fluorescence emission spectra of  $7.Fe^{3+}.F^-$  complex upon addition of  $Fe^{3+}$  (0-500 equiv) in THF.
